# Supplementary material for: Impact of shortages of amoxicillin and amoxicillin/clavulanate on the outcome of bacterial sinusitis in adults: a French retrospective, single-centre study
Source: Research Square preprint supplement (doi:10.21203/rs.3.rs-6658540/v1), 2025-08-08
Supplement: Supplementary file 1 [file a2c9e5e8332db865ddacd39e.docx]

Table S1: Microbiological comparisons between complicated and non-complicated sinusitis.

|  |  |  |  |  | **Univariate model** | | |
| --- | --- | --- | --- | --- | --- | --- | --- |
| **Variables** | Total N=142 | % | **Non-complicated sinusitis** | **Complicated sinusitis** | Odds ratio (OR) | CI 95% | p value |
| **Monomicrobial*** | 49 | 35% | 41 | 8 | 0.81 | [0.28-2.18] | 0.82 |
|  |  |  |  |  |  |  |  |
| **Polymicrobial*** | 88 | 62% | 72 | 16 | 0.98 | [0.38-2.64] | 1 |
|  |  |  |  |  |  |  |  |
| ***S. aureus*** | 36 | 25% | 32 | 4 | 0.48 | [0.11-1.57] | 0.22 |
|  |  |  |  |  |  |  |  |
| ***H. influenzae*** | 20 | 14% | 17 | 3 | 0.76 | [0.13-2.97] | 1 |
|  |  |  |  |  |  |  |  |
| ***Enterobacterales*** | 27 | 19% | 25 | 2 | 0.31 | [0.03-1.38] | 0.16 |
|  |  |  |  |  |  |  |  |
| **OPF**** | 62 | 44% | 52 | 10 | 0.77 | [0.29-1.99] | 0.66 |
|  |  |  |  |  |  |  |  |
| ***P. aeruginosa*** | 15 | 11% | 15 | 0 | inf | [inf-1.78] | 0.07 |
|  |  |  |  |  |  |  |  |
| ***S. pneumoniae*** | 9 | 6% | 8 | 1 | 0.54 | [0.01-4.37] | 1 |
|  |  |  |  |  |  |  |  |
| ***M. catharralis*** | 2 | 1% | 2 | 0 | inf | [inf-24] | 1 |
|  |  |  |  |  |  |  |  |
| **Oral streptococci** | 17 | 12% | 7 | 10 | 9.5 | [2.82-34.1] | <0.001* |

Fisher's exact test, probability values < 0.05 were considered statistically significant

* NA = 5 (samples with a negative culture).

**OPF : oropharyngeal flora

Other bacteria not analysed (consider as contamination) : 4 CNS, 2 E. faecium, 1 proprionibacter, 1 Acromobacter, 1 Eikinella, 1 Pasteurella, 1 Prevotella

Table S2: Comparison of patient characteristics in the two periods

| **Variables** | Values | Total  N=142 | % | **No shortage**  **(n=60)** | **Shortage**  **(n=82)** | Odds ratio | IC 95% | P value |
| --- | --- | --- | --- | --- | --- | --- | --- | --- |
| **Age, years** | 26 - 65 | 93 | 65% | 45 | 48 |  |  |  |
|  | ≤ 25 | 13 | 9% | 3 | 10 | 3.1 | [0.73-18.6] | 0.14 |
|  | > 65 | 36 | 25% | 12 | 24 | 1.87 | [0.79-4.61] | 0.17 |
|  |  |  |  |  |  |  |  |  |
| **Sex** | men | 72 | 51% | 20 | 52 | 3.43 | [1.63-7.43] | 0.0006* |
|  |  |  |  |  |  |  |  |  |
| **Complicated sinusitis** | yes | 26 | 18% | 3 | 23 | 7.32 | [2.04-40.15] | 0.0003* |
|  |  |  |  |  |  |  |  |  |
| **BMI, kg/m2** | <25 | 46 | 46% | 19 | 27 |  |  |  |
|  | 25-30 | 34 | 34% | 15 | 19 | 0.89 | [0.33-2.41] | 0.82 |
|  | >30 | 21 | 21% | 6 | 15 | 1.74 | [0.52-6.54] | 0.42 |
|  | no value | 41 |  |  |  |  |  |  |
|  |  |  |  |  |  |  |  |  |
| **Diabetes mellitus** | yes | 19 | 14% | 8 | 11 | 0.98 | [0.33-3.03] | 1 |
|  |  |  |  |  |  |  |  |  |
| **Chronic kidney disease** | yes | 11 | 8% | 5 | 6 | 0.85 | [0.2-3.71] | 1 |
|  |  |  |  |  |  |  |  |  |
| **Cirrhosis** | yes | 1 | 1% | 0 | 1 | inf | [0.02-inf] | 1 |
|  |  |  |  |  |  |  |  |  |
| **Active cancer** | yes | 6 | 4% | 2 | 4 | 1.45 | [0.2-16.56] | 1 |
|  |  |  |  |  |  |  |  |  |
| **ENT cancer** | yes | 5 | 4% | 2 | 3 | 1.1 | [0.12-13.28] | 1 |
|  |  |  |  |  |  |  |  |  |
| **Malignant haemopathy** | yes | 12 | 9% | 6 | 6 | 0.7 | [0.18-2.76] | 0.56 |
|  |  |  |  |  |  |  |  |  |
| **Radiotherapy** | yes | 5 | 4% | 3 | 2 | 0.47 | [0.04-4.21] | 0.65 |
|  |  |  |  |  |  |  |  |  |
| **Immune deficiency** | yes | 5 | 4% | 3 | 2 | 0.47 | [0.04-4.21] | 0.65 |
|  |  |  |  |  |  |  |  |  |
| **Corticosteroid use** | yes | 29 | 21% | 11 | 18 | 1.22 | [0.49-3.15] | 0.68 |
|  |  |  |  |  |  |  |  |  |
| **Chemotherapy** | yes | 2 | 1% | 1 | 1 | 0.71 | [0.01-56.88] | 1 |
|  |  |  |  |  |  |  |  |  |
| **Immunosuppressive treatment** | yes | 20 | 14% | 10 | 10 | 0.68 | [0.23-1.97] | 0.47 |
|  |  |  |  |  |  |  |  |  |
| **Organ transplant** | yes | 7 | 5% | 4 | 3 | 0.52 | [0.07-3.22] | 0.45 |
|  |  |  |  |  |  |  |  |  |
| **Allogeneic transplant** | yes | 8 | 6% | 4 | 4 | 0.7 | [0.13-3.95] | 0.72 |
|  |  |  |  |  |  |  |  |  |
| **Chronic sinus disease** | yes | 43 | 31% | 16 | 27 | 1.34 | [0.61-3.03] | 0.46 |
|  |  |  |  |  |  |  |  |  |
| **Alcohol use** | yes | 2 | 29% | 1 | 1 | 0.73 | [0.01-58.33] | 1 |
|  |  |  |  |  |  |  |  |  |
| **Tobacco use** | yes | 25 | 18% | 9 | 16 | 1.4 | [0.53-3.93] | 0.51 |
|  |  |  |  |  |  |  |  |  |
| **Intravenous drug use** | yes | 1 | 1% | 0 | 1 | inf | [0.02-inf] | 1 |
|  |  |  |  |  |  |  |  |  |
| **Antibiotic allergy** | yes | 12 | 9% | 6 | 6 | 0.72 | [0.18-2.86] | 0.76 |

BMI: body mass index; Fisher's exact test, Probability values < 0.05 were considered statistically significant and are shown with an *.

Table S3: Activity (emergency surgery and emergency consult) and cases of complicated sinusitis during the study periods.

| **Variables** | **Total** | **No shortage period (%)** | **Shortage period (%)** |
| --- | --- | --- | --- |
| Emergency consultations | 23743 | 10260 (43%) | 13483 (57%)* |
| Ethmoidectomy | 192 | 104 (54%) | 88 (46%) |
| Complicated sinusitis | 26 | 3 (12%) | 23 (88%)* |

*There was an association between the proportion of cases of complicated sinusitis and the number of emergency department visits across the two periods, OR = 0.17; IC 95 % [0.03 – 0.57], p = 0.001

Appendix

ICD10 diagnosis codes for complicated sinusitis: J01.0, J01.1, J01.2, J01.3, J01.4, J01.8, J01.9, J32.0, J32.1, J32.2, J32.3, J32.8, J32.9
